# Supplementary material
Source: PubMed Central journal article supplement (PMC3648022)
Supplement: IAI.01226-12_zii999090133so1.pdf [file IAI.01226-12_zii999090133so1.pdf]

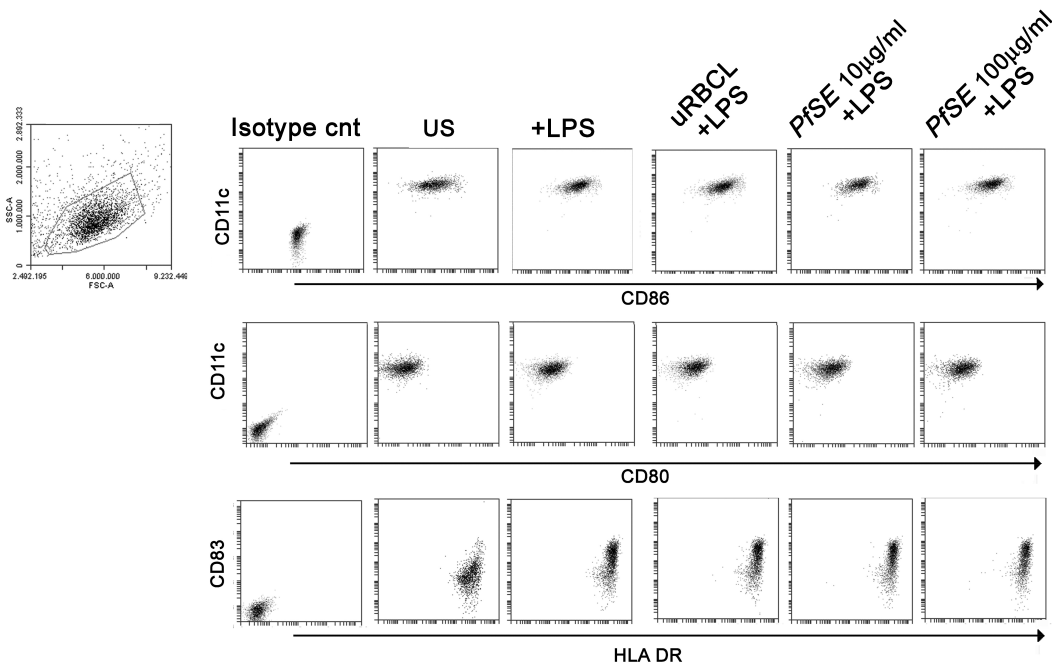

|       | LPS               | uRBCL (µg/ml)+LPS |                   |                   | PfSE (µg/ml)+LPS  |                   |                   |
|-------|-------------------|-------------------|-------------------|-------------------|-------------------|-------------------|-------------------|
|       |                   | 1                 | 10                | 100               | 1                 | 10                | 100               |
| CD86  | 170.57<br>± 15.53 | 188.15<br>± 19.45 | 188.51<br>± 18.84 | 188.64<br>± 18.47 | 197.88<br>± 19.02 | 200.62<br>± 19.19 | 201.56<br>± 20.69 |
| CD80  | 137.66<br>± 2.72  | 136.44<br>± 2.55  | 136.55<br>± 1.57  | 137.35<br>± 1.36  | 142.38<br>± 0.58  | 138.01<br>± 1.23  | 139.03<br>± 0.72  |
| HLADR | 168.72<br>± 4.77  | 178.14<br>± 5.94  | 179.26<br>± 2.05  | 183.99<br>± 4.45  | 180.30<br>± 4.93  | 169.47<br>± 8.75  | 179.09<br>± 1.81  |
| CD83  | 188.86<br>± 4.80  | 181.12<br>± 2.52  | 182.63<br>± 1.83  | 191.78<br>± 0.77  | 198.23<br>± 7.34  | 195.81<br>± 4.98  | 198.25<br>± 1.95  |

**Figure 1 Supplementary**

**Effect of *PfSE* or uRBCL on LPS-induced expression of co-stimulatory markers by MDDC**

MDDC were cultured with *PfSE* (1, 10, 100 µg/ml) or with similar amounts of uRBC lysates for 16 hours and then subjected to stimulation with LPS (20 ng/ml) for an additional 24 hours. Cells were stained with PE-aCD11c, FITC-aCD80, PE-aCD83, APC-aCD86, and FITC-aHLA-DR and analyzed by flow cytometry. The figure shows a representative scatterplot out of 5 performed.

The table shows the results obtained from 5 experiments. Data are expressed as mean RFI ± SE

$$\text{RFI} = \frac{\text{MFI of stimulated cells}}{\text{MFI of unstimulated cells}} \times 100$$

No significant changes of LPS-induced expression of CD80, CD83, CD86 and HLA-DR were recorded following previous exposure to *PfSE* or uRBCL.
