# Supplementary material
Source: PubMed Central journal article supplement (PMC3648022)
Supplement: IAI.01226-12_zii999090133so2.pdf [file IAI.01226-12_zii999090133so2.pdf]

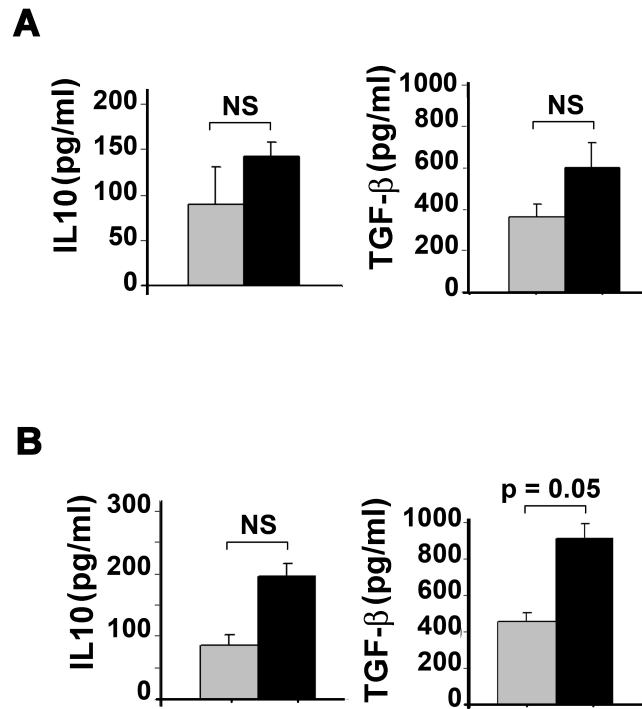

**Figure 2 Supplementary**

CD4<sup>+</sup> T cells isolated from PBMC of 8 healthy donors were cultured at 10<sup>6</sup>/ml with autologous MDDC previously exposed to 10 μg/ml of uRBC-lysates (grey column) or *PfSE* (black column) at 20:1 T/DC ratio. IL10 and total TGF-β were measured in supernatants collected after 3 days (A) or after 5 days (B) of co-cultures by immunoplex array. Data are expressed as mean ± SE of cytokine production (n=8). Statistical analysis was performed by Student's T- test.
